---

Erratum

## Efficient simulation of intrinsic, extrinsic and external noise in biochemical systems

Dennis Pischel, Kai Sundmacher and Robert J. Flassig

---

*Bioinformatics*, Volume 33, Issue 14, 15 July 2017, Pages i319–i324,  
<https://doi.org/10.1093/bioinformatics/btx253>

This material is now available in the [supplementary data](#) available at *Bioinformatics* online.

The publisher would like to inform readers that the MATLAB code referred to in the manuscript was missing from the [supplementary material](#) provided.
